# Supplementary material
Source: publisher site journal article supplement (https://www.dovepress.com/article/339114)
Supplement: Supplementary file 1 [file get_supplementary_file.php]

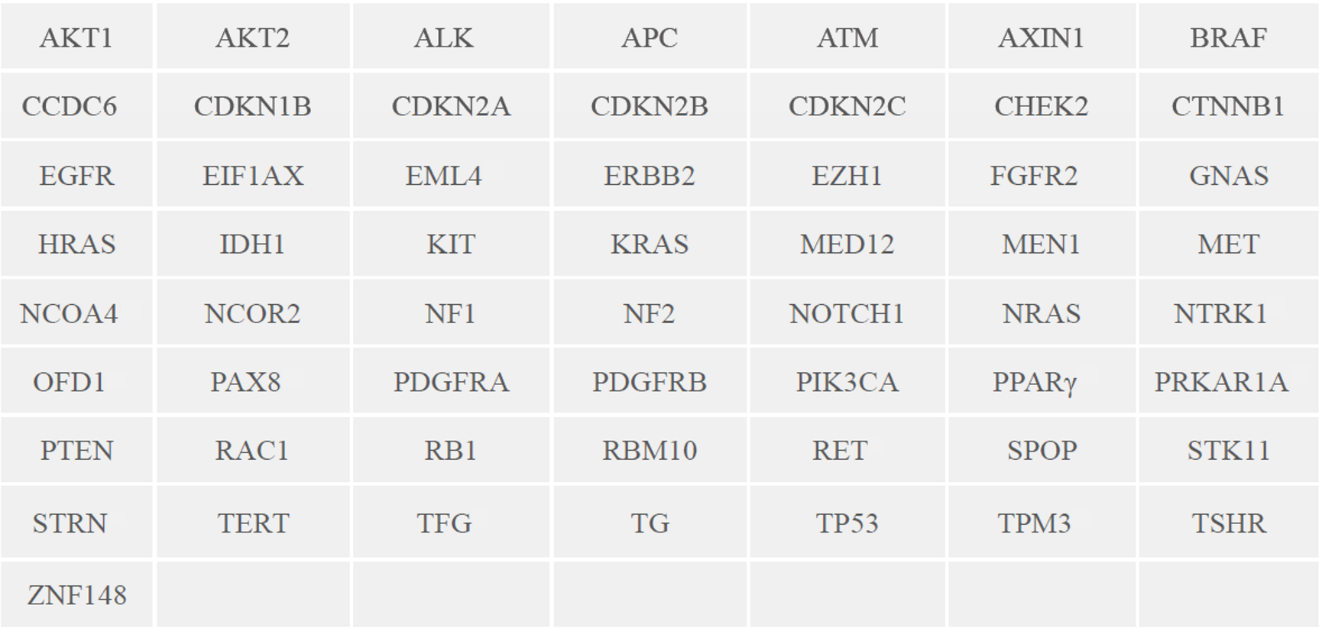


**Figure S1. Detection List of 57 high frequency mutated genes in PTC**


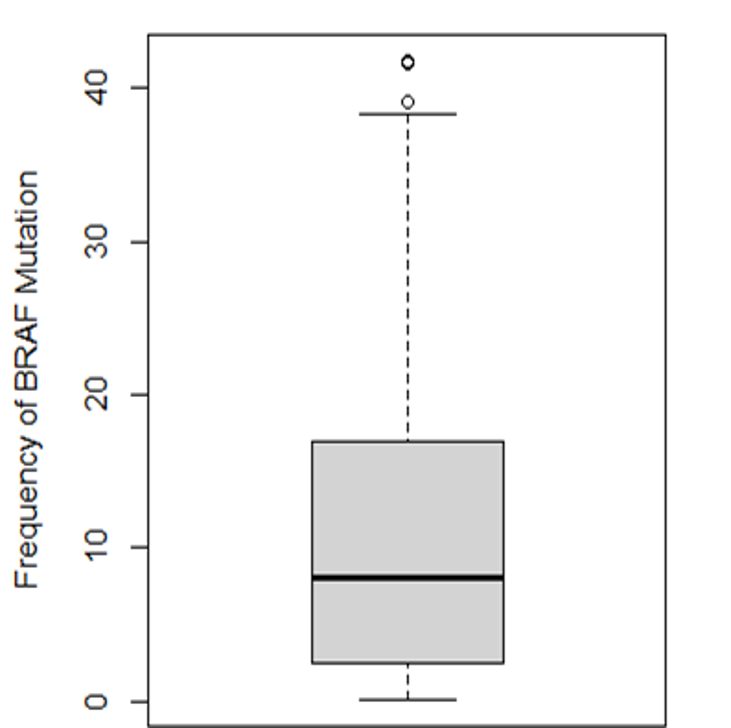


**Figure S2.** **Distribution of *BRAF* allele frequency in overall levels.**


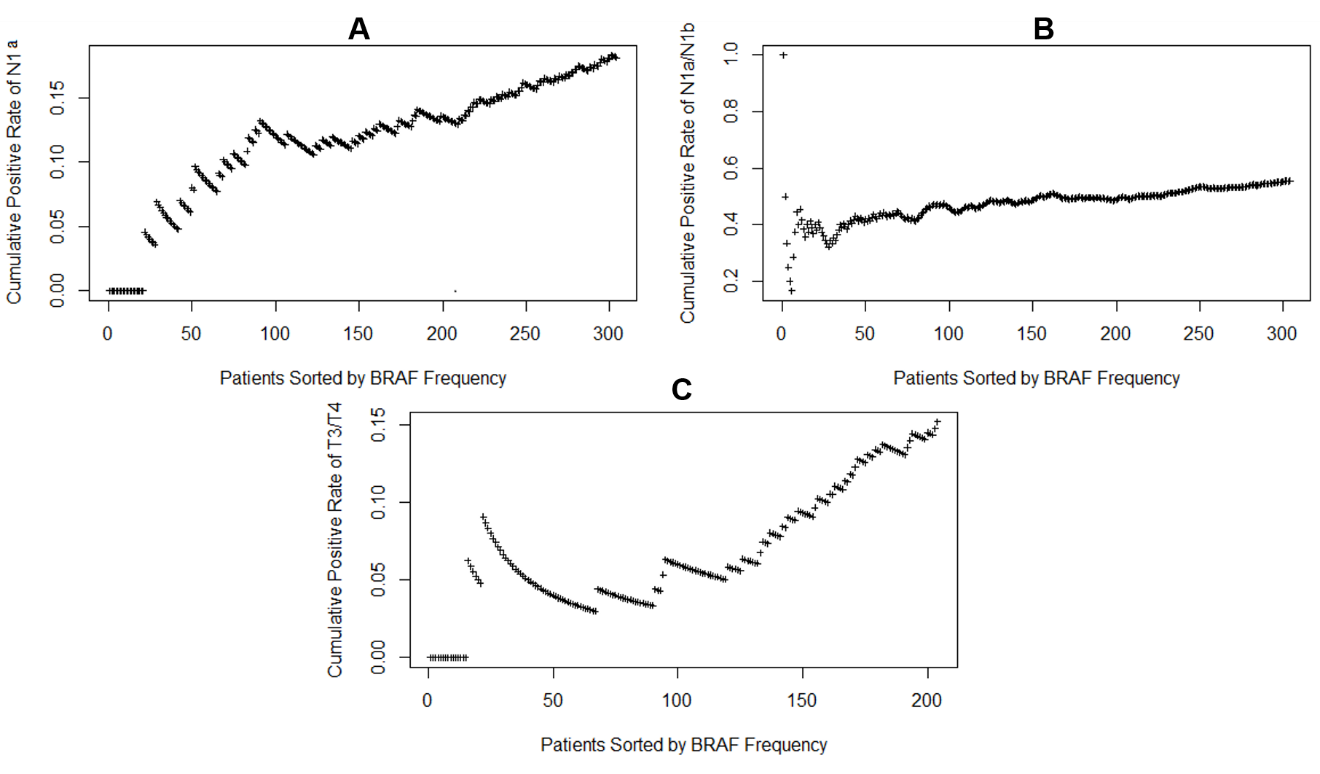


**Figure S3** **Cumulative positive rate of T/N stages sorted by MAF of *BRAF*.** We sort the patients by their BRAF frequency ascendingly, and plot the cumulative positive rate of each, which is the average positive rate of all patients before that certain individuals. A: cumulative positive rate of N1a stage. B: cumulative positive rate of N1b stage. C: cumulative positive rate of T3/T4 stages. MAF: mutation allele frequency.

**Table S1 Clinical characteristics in different pathological stage**

1. **T-stage**

| **T-stage** | **Gender** | | **Age** | | | | **Location** | | | |
| --- | --- | --- | --- | --- | --- | --- | --- | --- | --- | --- |
|  | Male | Female | <45 | >=45 | <55 | >=55 | Unilateral | Bilateral | Right | Left |
| T1 | 47 | 151 | 89 | 104 | 147 | 46 | 148 | 50 | 80 | 68 |
| T2 | 5 | 15 | 10 | 9 | 14 | 5 | 13 | 7 | 5 | 8 |
| T3 | 6 | 17 | 10 | 13 | 20 | 3 | 18 | 5 | 10 | 8 |
| T4 | 7 | 9 | 5 | 8 | 8 | 5 | 8 | 5 | 3 | 5 |

1. **N-stage**

| **N-stage** | **Gender** | | **Age** | | | | **Location** | | | |
| --- | --- | --- | --- | --- | --- | --- | --- | --- | --- | --- |
|  | Male | Female | <45 | >=45 | <55 | >=55 | Unilateral | Bilateral | Right | Left |
| N0 | 37 | 141 | 66 | 107 | 122 | 51 | 152 | 26 | 84 | 68 |
| N1a | 39 | 106 | 78 | 66 | 113 | 31 | 96 | 49 | 50 | 46 |
| N1b | 23 | 49 | 44 | 25 | 61 | 8 | 51 | 21 | 32 | 19 |

**Table S2** **Characteristics of *RET*-*CCDC6+* and *RET-CCDC6-* population**

|  | *CCDC6*+ | *CCDC6*- |
| --- | --- | --- |
|  | N=12 | N=16 |
|  | *p*=0.257***** | |
| Mean Age | 33.5 | 38.31 |
| <45 | 11 | 11 |
| >=45 | 1 | 5 |
| <55 | 12 | 15 |
| >=55 | 0 | 1 |
| Gender | *p*=0.057***** | |
| Male | 5 | 1 |
| Female | 7 | 15 |
| Location | *p*=0.536***** | |
| Bilateral | 5 | 3 |
| Right | 5 | 9 |
| Left | 2 | 4 |
| T Stage | *p*=1.000***** | |
| T1 | 3 | 3 |
| T2 | 2 | 2 |
| T3 | 2 | 3 |
| T4 | 4 | 3 |
| N Stage | *p*=0.124***** | |
| N0 | 0 | 3 |
| N1a | 2 | 6 |
| N1b | 10 | 7 |

*Examined by Fisher’s exact test.

**TableS3 Clinicopathological characteristic of *TERT+* population compare to *BRAF+/TERT-* population**

|  | *BRAF+*/*TERT-* | | *TERT*+ | |
| --- | --- | --- | --- | --- |
|  | N=302 | | N=9 | |
|  | No. | % | No. | % |
| Mean Age | 44.74 | | 55.56 | |
| <45 | 142 | 47.0 | 0 | 0 |
| >=45 | 152 | 50.3 | 9 | 100 |
| <55 | 226 | 74.8 | 5 | 55.6 |
| >=55 | 68 | 22.5 | 4 | 44.4 |
| Gender |  |  |  |  |
| Male | 80 | 26.5 | 3 | 33.3 |
| Female | 222 | 73.5 | 6 | 66.7 |
| Location | |  |  |  |
| Bilateral | 71 | 23.5 | 3 | 33.3 |
| Right | 130 | 43.0 | 1 | 11.1 |
| Left | 101 | 33.5 | 5 | 55.6 |
| T-stage |  | |  | |
| T1 | 158 | 78.1 | 3 | 37.5 |
| T2 | 13 | 6.8 | 1 | 12.5 |
| T3 | 20 | 10.2 | 1 | 12.5 |
| T4 | 7 | 4.9 | 3 | 37.5 |
| N-stage | |  |  |  |
| N0 | 136 | 45.0 | 4 | 44.5 |
| N1 | 114 | 37.7 | 2 | 22.2 |
| N1b | 52 | 17.3 | 3 | 33.3 |

**Table S4 Difference of genotypecontribution in different countries**

| Countries | This study | China1 | The U.S2 | Japan3 | Japan4 | Korea5 | Arabia6**#** | Italian7 |
| --- | --- | --- | --- | --- | --- | --- | --- | --- |
| N= | 395 | 355 | 496 | 631 | 144 | 2624 | 909 | 206 |
| *BRAF* | 78.5% | 72.4% | 59.7% | 38.4% | 38.2% | 73.7% | 59.5% | 38.1% |
| Gene fusions | 7.1%***** | 13.8% | 15.3% | N.A. | N.A. | N.A. | N.A | N.A |
| *TERT* | 2.3% | 2.0% | 9.4% | N.A. | 6.0% | N.A. | N.A | N.A |
| *RAS* | 2.0% | 2.8% | 12.9% | N.A. | N.A. | N.A. | 7.9% | N.A |

N.A.: Not Applicable

*All gene fusion events are *RET*-fusions

#About 12% samples have *PIKC3A* mutations

The percentage of genotype contribution is calculated by the number of mutations divided by the number of patients.

1. Liang J, Cai W, Feng D, et al. Genetic landscape of papillary thyroid carcinoma in the Chinese population. *J Pathol.* 2018;244(2):215-226.

2. Cancer Genome Atlas Research N. Integrated genomic characterization of papillary thyroid carcinoma. *Cell.* 2014;159(3):676-690.

3. Ito Y, Yoshida H, Maruo R, et al. BRAF mutation in papillary thyroid carcinoma in a Japanese population: its lack of correlation with high-risk clinicopathological features and disease-free survival of patients. *Endocr J.* 2009;56(1):89-97.

4. Nasirden A, Saito T, Fukumura Y, et al. In Japanese patients with papillary thyroid carcinoma, TERT promoter mutation is associated with poor prognosis, in contrast to BRAF (V600E) mutation. *Virchows Archiv.* 2016;469(6):687-696.

5. Hong AR, Lim JA, Kim TH, et al. The Frequency and Clinical Implications of the BRAF(V600E) Mutation in Papillary Thyroid Cancer Patients in Korea Over the Past Two Decades. *Endocrinol Metab (Seoul).* 2014;29(4):505-513.

6. Rashid FA, Munkhdelger J, Fukuoka J, Bychkov A. Prevalence of BRAF(V600E) mutation in Asian series of papillary thyroid carcinoma-a contemporary systematic review. *Gland Surg.* 2020;9(5):1878-1900.

7. Fugazzola L, Puxeddu E, Avenia N, et al. Correlation between B-RAFV600E mutation and clinico-pathologic parameters in papillary thyroid carcinoma: data from a multicentric Italian study and review of the literature. *Endocr Relat Cancer.* 2006;13(2):455-464.
